# Supplementary material for: Reconstructing the Dynamics of HIV Evolution within Hosts from Serial Deep Sequence Data
Source: PLOS journal article supplement (doi:10.1371/journal.pcbi.1002753), 2012-11-01
Supplement: S6 (10.1371/journal.pcbi.1002753.s006) [file journal.pcbi.1002753.s006]

## Supporting Text S1

The efficiency of RNA extraction using the NucliSENS easyMAG was estimated from published respiratory syncytial detection RNA detection results [1] where an estimated 5, 10, 25 and 50 copies of viral RNA from a dilution series were added to lysis buffer prior to extraction, respectively yielding 0, 3, 8 and 8 successful amplifications out of 8 replicates. Since only 20% of the extracted RNA was transferred to amplification reactions in that study, the likelihood of extraction efficiency is given by:

$$L(r) = Bn(0, 8, 1 - e^r) \times Bn(7, 8, 1 - e^{2r}) \times Bn(7, 8, 1 - e^{5r}) \times Bn(8, 8, 1 - e^{10r})$$

where  $Bn(n, k, p)$  is the binomial distribution for  $n$  trials and  $k$  successes with probability  $p$ , and  $1 - e^{-\lambda}$  is the Poisson probability of a non-zero count given rate  $\lambda$ .  $L(r)$  is maximized at  $r = 0.444$ .

- [1] Manji R, Lotlikar M, Zhang F, Ginocchio CC (2009) Clinical evaluation of NucliSENS magnetic extraction and NucliSENS analytical specific reagents for the real-time detection of respiratory syncytial virus (RSV) in paediatric respiratory specimens. *J Clin Pathol* 62: 998-1002.
